# Supplementary material for: Development and Validation of a Safety Climate Scale for the German Armed Forces
Source: Atypon-hosted journal article supplement (doi:10.1027/2698-1866/a000023), 2022-04-29
Supplement: 2698-1866_a000023_esm1.pdf [file 2698-1866_a000023_esm1.pdf]

Electronic Supplementary Material 1 (ESM 1) for  
**Development and Validation of an Aviation Safety Climate Scale for the  
German Armed Forces**

**Content**

|                                                                                                                           |    |
|---------------------------------------------------------------------------------------------------------------------------|----|
| Table E1 Comparison of the original Aviation Safety Climate Scale from Evans et al. (2007) and the adapted ASCS-GAF ..... | 2  |
| Table E2 Results of t-tests for independence of both split samples .....                                                  | 4  |
| Table E3 Intercorrelations of the ASCS-GAF factors .....                                                                  | 5  |
| Table E4 Summary of four-factor model.....                                                                                | 6  |
| Figure E1 Four-factor Model of the Aviation Safety Climate Scale for the German Armed Forces.....                         | 8  |
| Table E5 Summary of two-factor model .....                                                                                | 9  |
| Figure E2 Two-factor Model of the Aviation Safety Climate Scale for the German Armed Forces.....                          | 11 |

**Table E1**

*Comparison of the original Aviation Safety Climate Scale from Evans et al. (2007) and the adapted ASCS-GAF*

| Factor                                                | Original item                                                                                                       | Translated & adapted item                                                                                                                                                | Modifications made                                                              |
|-------------------------------------------------------|---------------------------------------------------------------------------------------------------------------------|--------------------------------------------------------------------------------------------------------------------------------------------------------------------------|---------------------------------------------------------------------------------|
| <i>Management Commitment and Safety Communication</i> | Suggestions for improving safety were encouraged                                                                    | Das Personal wird ermutigt, eigene Vorschläge zur Verbesserung der Sicherheit einzubringen.                                                                              | Rephrasing into an active form                                                  |
|                                                       | Management were genuinely interested in safety issues                                                               | Die Verbandsführung interessiert sich ernsthaft für sicherheitsrelevante Themen.                                                                                         | “Management” → “Unit leadership”                                                |
|                                                       | Pilots were consulted about safety issues                                                                           | Das Personal wird bei sicherheitsrelevanten Themen beteiligt                                                                                                             | “Pilots” → “Personnel”                                                          |
|                                                       | Pilots were able to openly discuss safety problems with supervisors or managers                                     | Das Personal kann offen mit Vorgesetzten und Verbandsführung über sicherheitsrelevante Probleme sprechen                                                                 | “Pilots” → “Personnel”<br>“Managers” → “Unit leadership”                        |
|                                                       | Pilots were given sufficient feedback regarding safety incidents involving company aircraft                         | Das Personal erhält genügend Feedback über Zwischenfälle mit bundeswehreigenen Luftfahrzeugen                                                                            | “Pilots” → “Personnel”<br>“Company aircraft” → “German Armed Forces aircraft”   |
|                                                       | Management had a good understanding of operational issues that impacted on flight safety                            | Die Verbandsführung hat ein gutes Verständnis der operationellen Themen, die einen Einfluss auf die Flugsicherheit haben                                                 | “Management” → “Unit leadership”                                                |
|                                                       | Management regarded safety to be an important part of company operations                                            | Die Verbandsführung sieht das Thema Sicherheit als einen wichtigen Teil des täglichen Dienstbetriebes an                                                                 | “Management” → “Unit leadership”<br>“Company operations” → “Service operations” |
|                                                       | Management looked for underlying factors that contributed to safety incidents rather than blame the people involved | Die Verbandsführung sucht bei sicherheitsrelevanten Vorkommnissen eher nach den dazu führenden und beitragenden Faktoren anstatt das beteiligte Personal zu beschuldigen | “Management” → “Unit leadership”                                                |
|                                                       | Pilots were encouraged to consider that safety was more important than keeping to the schedule                      | Das Personal wird ermutigt zu berücksichtigen, dass Sicherheit wichtiger ist als Zeitvorgaben zu erfüllen                                                                | “Pilots” → “Personnel”                                                          |

|                                  |                                                                                   |                                                                                                       |                                                                                             |
|----------------------------------|-----------------------------------------------------------------------------------|-------------------------------------------------------------------------------------------------------|---------------------------------------------------------------------------------------------|
|                                  | Management allocated sufficient resources to safety                               | Die Verbandsführung stellt genügend Ressourcen für die Flugsicherheitsarbeit zur Verfügung            | “Management” → “Unit leadership”<br>“Safety” → “Flight safety work”                         |
| <i>Safety Training</i>           | There was regular training to update knowledge                                    | Es gibt regelmäßige Trainings, um das eigene Wissen auf aktuellem Stand zu halten                     | -                                                                                           |
|                                  | Regular training was provided in a range of emergency                             | Regelmäßiges Training der unterschiedlichen Notverfahren wird angeboten                               | -                                                                                           |
|                                  | Company training provided appropriate skills and experience for normal operations | Das angebotene Training führt zu genügend Kompetenz und Erfahrung für den täglichen Dienstbetrieb.    | “Company training“ → „Offered training“<br>„Normal operations“ → „Daily service operations” |
|                                  | Training was provided for new procedures or equipment                             | Für neue Betriebsverfahren oder Ausrüstung wird ein Training durchgeführt.                            | -                                                                                           |
| <i>Equipment and Maintenance</i> | Aircraft were maintained to a safe standard                                       | Im Verband führt die Wartung und Instandsetzung der Luftfahrzeuge zu einem hohen Sicherheitsstandard. | Rephrasing into an active form<br>“maintenance” → “maintenance and repair”                  |
|                                  | Equipment was updated or replaced when necessary                                  | Wenn nötig wird die im Verband vorhandene Ausrüstung modernisiert oder ersetzt                        | -                                                                                           |
|                                  | Reported technical faults that impacted on safety were rectified                  | Gemeldete technische Mängel, die Auswirkungen auf die Sicherheit haben, werden korrigiert.            | -                                                                                           |
|                                  | Adequate resources were made available to perform maintenance                     | Es werden genügend Ressourcen für die Wartung und Instandsetzung zur Verfügung gestellt               | “maintenance” → “maintenance and repair”                                                    |

---

*Note.* All items were rephrased into a present form to fit the needs of the Directorate Aviation Safety of the German Armed Forces.

**Table E2***Results of t-tests for independence of both split samples*

| Item                                                                                                                  | Sample A |           |          | Sample B |           |          | <i>t</i> | <i>df</i> | <i>p</i> |
|-----------------------------------------------------------------------------------------------------------------------|----------|-----------|----------|----------|-----------|----------|----------|-----------|----------|
|                                                                                                                       | <i>M</i> | <i>SD</i> | <i>N</i> | <i>M</i> | <i>SD</i> | <i>N</i> |          |           |          |
| 1 Suggestions for improving safety were encouraged                                                                    | 3.50     | .97       | 496      | 3.53     | .95       | 490      | -.50     | 984       | .62      |
| 2 Management were genuinely interested in safety issues                                                               | 3.66     | .97       | 494      | 3.57     | 1.02      | 490      | 1.52     | 982       | .13      |
| 3 Pilots were consulted about safety issues                                                                           | 3.54     | .96       | 494      | 3.54     | .94       | 490      | .06      | 982       | .95      |
| 4 Pilots were able to openly discuss safety problems with supervisors or managers                                     | 3.81     | 1.00      | 495      | 3.80     | 1.00      | 489      | .13      | 982       | .89      |
| 5 Pilots were given sufficient feedback regarding safety incidents involving company aircraft                         | 3.28     | 1.07      | 496      | 3.27     | 1.07      | 491      | .08      | 985       | .94      |
| 6 Management had a good understanding of operational issues that impacted on flight safety                            | 3.39     | .89       | 491      | 3.33     | .87       | 483      | 1.13     | 972       | .26      |
| 7 Management regarded safety to be an important part of company operations                                            | 3.89     | .96       | 493      | 3.89     | .92       | 489      | -.02     | 980       | .99      |
| 8 Management looked for underlying factors that contributed to safety incidents rather than blame the people involved | 3.32     | 1.07      | 492      | 3.36     | 1.03      | 487      | -.60     | 977       | .55      |
| 9 Management encouraged pilots to consider safety more important than keeping to the schedule                         | 3.34     | 1.15      | 496      | 3.39     | 1.09      | 490      | -.69     | 984       | .49      |
| 10 Management allocated sufficient resources to safety                                                                | 3.35     | 1.00      | 492      | 3.34     | .95       | 485      | .18      | 975       | .85      |
| 11 Training was received at regular intervals to refresh and update knowledge                                         | 3.19     | 1.10      | 494      | 3.23     | 1.03      | 489      | -.61     | 981       | .54      |
| 12 Regular training was provided for a range of emergency situations                                                  | 3.06     | 1.16      | 487      | 3.11     | 1.07      | 479      | -.60     | 960       | .55      |
| 13 Company training provided adequate skills and experience to carry out normal operations safely                     | 3.21     | 1.30      | 491      | 3.23     | .97       | 480      | -.24     | 969       | .81      |
| 14 Training was received when new procedures or equipment were introduced                                             | 3.23     | 1.07      | 491      | 3.25     | .99       | 484      | -.24     | 973       | .81      |

---

|                                                                     |      |      |     |      |      |     |      |     |     |
|---------------------------------------------------------------------|------|------|-----|------|------|-----|------|-----|-----|
| 15 Aircraft was maintained to safety standards                      | 3.96 | .86  | 489 | 4.01 | .83  | 484 | -.87 | 971 | .39 |
| 16 Equipment was updated and replaced when necessary                | 2.63 | 1.06 | 492 | 2.66 | 1.50 | 487 | -.46 | 977 | .64 |
| 17 Adequate resources were allocated to perform maintenance         | 3.68 | 1.00 | 493 | 3.72 | .97  | 487 | -.69 | 978 | .49 |
| 18 Reported technical faults that impacted on safety were rectified | 2.68 | 1.13 | 490 | 2.72 | 1.07 | 484 | -.50 | 970 | .62 |

---

**Table E3**

*Intercorrelations of the ASCS-GAF factors (Sample A, n=483)*

---

|          | Factor 1 | Factor 2 | Factor 3 |
|----------|----------|----------|----------|
| Factor 1 |          | .61**    | .60**    |
| Factor 2 | .61**    |          | .53**    |
| Factor 3 | .61**    | .54**    |          |

---

*Note 1.* Upper right half shows correlations of the original structure, lower left half shows adapted structure.

*Note 2.* \*\* $p < .01$ .

As can be seen, intercorrelations yielded a solid indication that these factors in fact depict different facets of the broader underlying construct “safety climate”.

**Table E4***Summary of four-factor model (Sample A, n=483)*

| Items                                                                                                                 | Item Loadings |     |     |      |
|-----------------------------------------------------------------------------------------------------------------------|---------------|-----|-----|------|
|                                                                                                                       | 1             | 2   | 3   | 4    |
| 1 Suggestions for improving safety were encouraged                                                                    | .62           |     |     |      |
| 2 Management were genuinely interested in safety issues                                                               | .54           |     |     |      |
| 3 Pilots were consulted about safety issues                                                                           | .78           |     |     |      |
| 4 Pilots were able to openly discuss safety problems with supervisors or managers                                     | .83           |     |     |      |
| 5 Pilots were given sufficient feedback regarding safety incidents involving company aircraft                         |               |     |     |      |
| 6 Management had a good understanding of operational issues that impacted on flight safety                            |               |     |     | -.56 |
| 7 Management regarded safety to be an important part of company operations                                            |               |     |     | -.72 |
| 8 Management looked for underlying factors that contributed to safety incidents rather than blame the people involved | .52           |     |     |      |
| 9 Management encouraged pilots to consider safety more important than keeping to the schedule                         |               |     |     |      |
| 10 Management allocated sufficient resources to safety                                                                |               |     | .46 |      |
| 11 Training was received at regular intervals to refresh and update knowledge                                         |               | .63 |     |      |
| 12 Regular training was provided for a range of emergency situations                                                  |               | .89 |     |      |
| 13 Company training provided adequate skills and experience to carry out normal operations safely                     |               | .85 |     |      |
| 14 Training was received when new procedures or equipment were introduced                                             |               | .60 |     |      |
| 15 Aircraft was maintained to safety standards                                                                        |               |     |     |      |
| 16 Equipment was updated and replaced when necessary                                                                  |               |     | .63 |      |
| 17 Adequate resources were allocated to perform maintenance                                                           |               |     | .44 |      |

---

|                                                                     |     |
|---------------------------------------------------------------------|-----|
| 18 Reported technical faults that impacted on safety were rectified | .73 |
|---------------------------------------------------------------------|-----|

---

*Note 1.* Items of the original scale are presented due to better readability.

*Note 2.* Factor loadings <.30 are not depicted.

*Note 3.* Total variance explained=52.17% (Factor 1=40.57%; Factor 2=5.96%; Factor 3=4.01%; Factor 4=1.64%).

*Note 4.* Summary data for Factor 1 (Eigenvalue=7.76,  $M=3.56$ ,  $SD=1.00$ ); Factor 2 (Eigenvalue=1.48,  $M=3.17$ ,  $SD=1.07$ ); Factor 3 (Eigenvalue=1.22,  $M=3.26$ ,  $SD=1.01$ ), Factor 4 (Eigenvalue=0.78,  $M=3.64$ ,  $SD=.93$ )

As can be seen, compared to the three-factor-solution, factor 1 was "shortened" to five items, whereas two items did not load on any other factor and two items loaded on factor 4. Factor 2 remained the same as in the three-factor model while factor 3 remained similar (item 15 does not load on it in this model). Explained variance of this model was 52%.

**Figure E1**

*Four-factor Model of the Aviation Safety Climate Scale for the German Armed Forces*

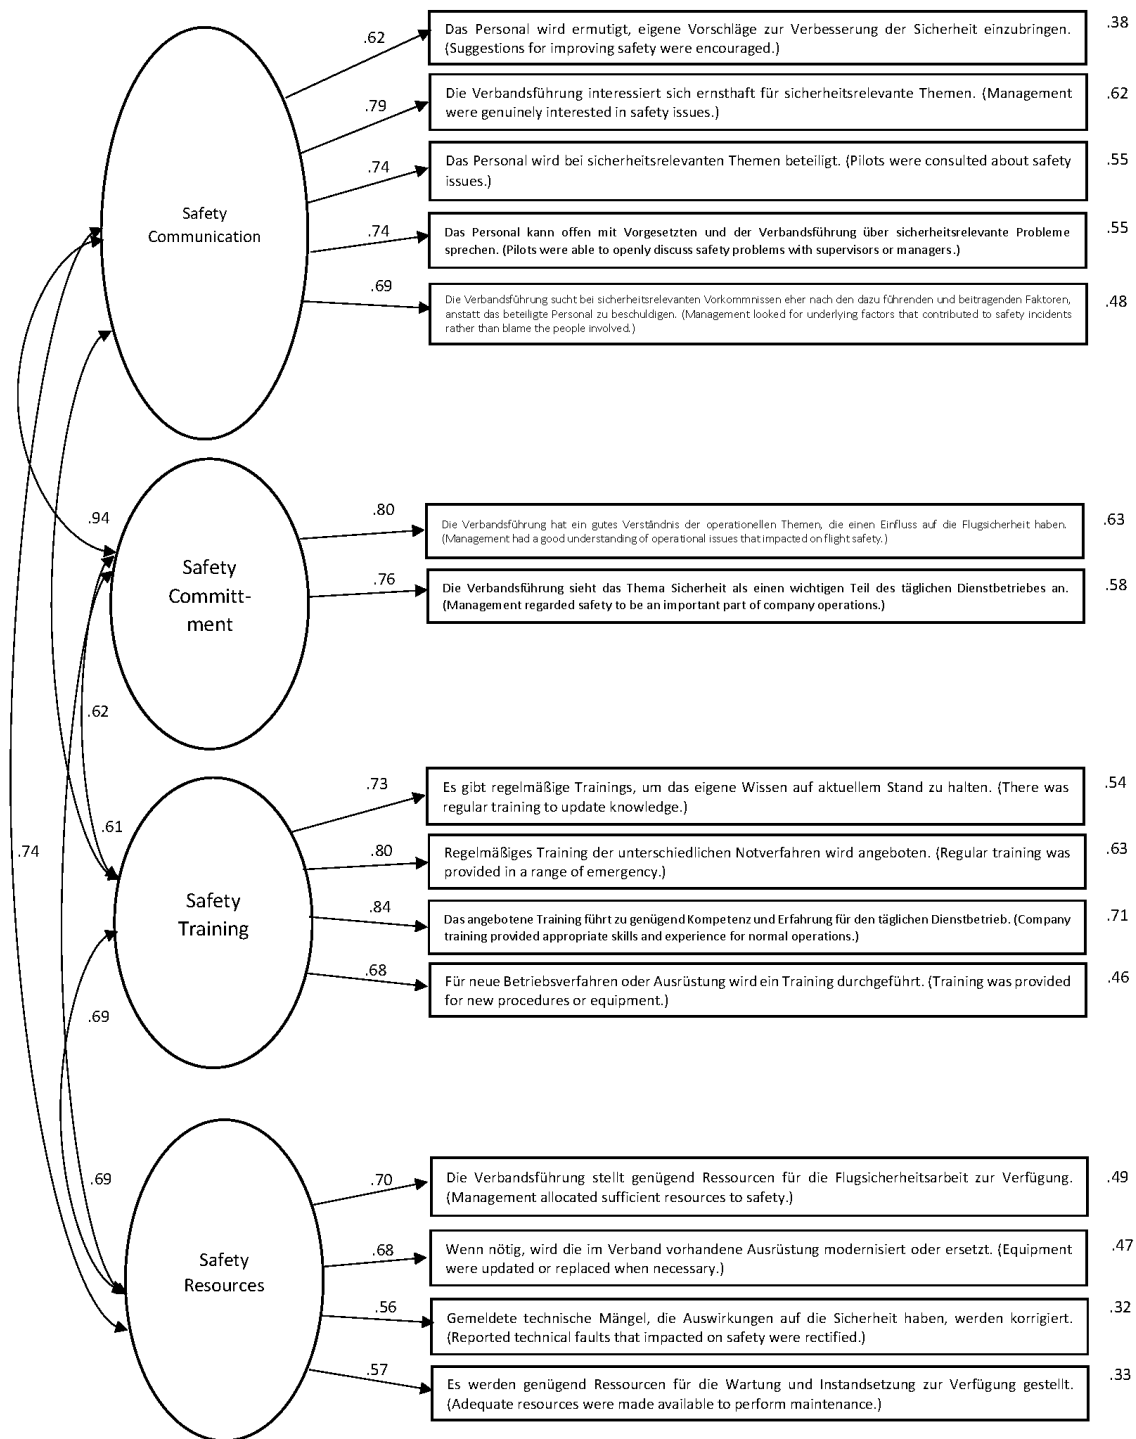

*Note.* Values from left to right: Correlations, regression weights, variances.



**Table E5***Summary of two-factor model (Sample A, n=483)*

| Items                                                                                                                 | Item Loading |     |
|-----------------------------------------------------------------------------------------------------------------------|--------------|-----|
|                                                                                                                       | 1            | 2   |
| 1 Suggestions for improving safety were encouraged                                                                    | .59          |     |
| 2 Management were genuinely interested in safety issues                                                               | .80          |     |
| 3 Pilots were consulted about safety issues                                                                           | .76          |     |
| 4 Pilots were able to openly discuss safety problems with supervisors or managers                                     | .81          |     |
| 5 Pilots were given sufficient feedback regarding safety incidents involving company aircraft                         | .39          |     |
| 6 Management had a good understanding of operational issues that impacted on flight safety                            | .70          |     |
| 7 Management regarded safety to be an important part of company operations                                            | .81          |     |
| 8 Management looked for underlying factors that contributed to safety incidents rather than blame the people involved | .67          |     |
| 9 Management encouraged pilots to consider safety more important than keeping to the schedule                         | .63          |     |
| 10 Management allocated sufficient resources to safety                                                                | .31          | .44 |
| 11 Training was received at regular intervals to refresh and update knowledge                                         |              | .65 |
| 12 Regular training was provided for a range of emergency situations                                                  |              | .83 |
| 13 Company training provided adequate skills and experience to carry out normal operations safely                     |              | .87 |

---

|                                                                           |     |
|---------------------------------------------------------------------------|-----|
| 14 Training was received when new procedures or equipment were introduced | .70 |
| 15 Aircraft was maintained to safety standards                            | .37 |
| 16 Equipment was updated and replaced when necessary                      | .40 |
| 17 Adequate resources were allocated to perform maintenance               | .31 |
| 18 Reported technical faults that impacted on safety were rectified       | .42 |

---

*Note 1.* Items of the original scale are presented due to better readability.

*Note 2.* Factor loadings < .30 are not depicted.

*Note 3.* Total variance explained=45.84% (Factor 1=40.26%; Factor 2=5.59%)

*Note 4.* Summary data for Factor 1 (Eigenvalue=7.76,  $M=3.58$ ,  $SD=.99$ ); Factor 2 (Eigenvalue=1.48,  $M=3.04$ ,  $SD=1.07$ )

As can be seen, the following changes happened compared to the three-factor model: Factor 1 of the bifactor solution consisted essentially of Factor 1 of the three-factor solution plus two items from the original Factor 3. The core of Factor 2 also remained and was supplemented by two items from the original Factor 3 plus item 10, which basically loaded on both factors (although slightly higher on Factor 2). Explained variance of this model was 46%.

**Figure E2**

*Two-factor Model of the Aviation Safety Climate Scale for the German Armed Forces*

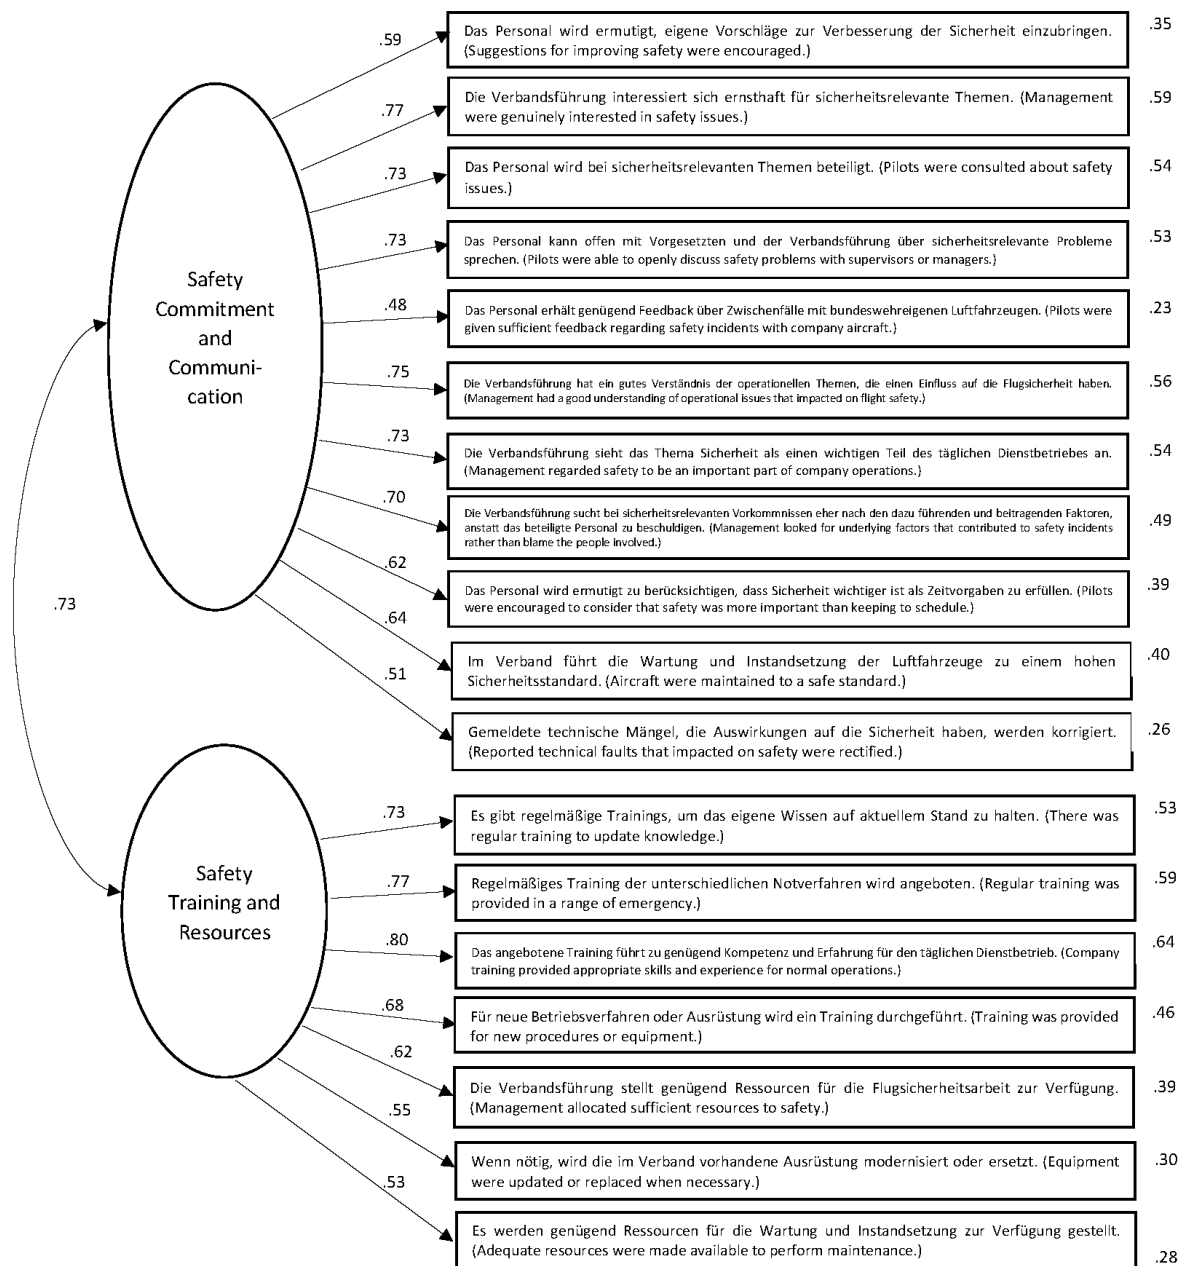

Note. Values from left to right: Correlations, regression weights, variances.
